# Supplementary material for: Differences in Mammalian Target of Rapamycin Gene Expression in the Peripheral Blood and Articular Cartilages of Osteoarthritic Patients and Disease Activity
Source: PubMed Central journal article supplement (PMC3707211; doi:10.1155/2013/461486), 2013-06-25
Supplement: 461486.f1.pdf [file 461486.f1.pdf]

**SUPPLEMENTARY MATERIAL for the manuscript:**

**Differences in *mTOR* (mammalian target of rapamycin) gene expression in the peripheral blood and articular cartilages of osteoarthritic patients and disease activity**  
by Elena V Tchetina et al.

**Supplementary, Table 3:** Relative mTOR gene expression in healthy control subjects (n=27), OA patients (**set 1**) ("LOW *mTOR*" subset, n=15; "HIGH *mTOR*" subset, n=32; END-STAGE patients, n=14), and OA patients (**set 2**) ("LOW *mTOR*" subset, n=8; "HIGH *mTOR*" subset", n=10; END-STAGE patients, n=13).

| Healthy | mTOR relative gene expression |         |
|---------|-------------------------------|---------|
|         | 1                             | 1,08783 |
|         | 2                             | 1,29558 |
|         | 3                             | 1,04163 |
|         | 4                             | 0,94523 |
|         | 5                             | 0,96338 |
|         | 6                             | 1,2323  |
|         | 7                             | 1,01318 |
|         | 8                             | 1,08049 |
|         | 9                             | 0,93539 |
|         | 10                            | 1,35818 |
|         | 11                            | 0,64667 |
|         | 12                            | 0,96004 |
|         | 13                            | 0,99386 |

|    |         |
|----|---------|
| 14 | 1,09445 |
| 15 | 1,37059 |
| 16 | 1,22704 |
| 17 | 0,81389 |
| 18 | 1,21152 |
| 19 | 0,81676 |
| 20 | 1,26097 |
| 21 | 0,97928 |
| 22 | 1,3057  |
| 23 | 0,88887 |
| 24 | 0,8253  |
| 25 | 0,79016 |
| 26 | 0,7135  |
| 27 | 1,3057  |

Subset

"LOW *mTOR*"

(set 1)

|   |         |
|---|---------|
| 1 | 0,07389 |
| 2 | 0,33365 |
| 3 | 0,38008 |
| 4 | 0,44799 |
| 5 | 0,40175 |

|    |         |
|----|---------|
| 6  | 0,79174 |
| 7  | 0,74165 |
| 8  | 0,68741 |
| 9  | 0,46235 |
| 10 | 0,8302  |
| 11 | 0,24414 |
| 12 | 0,42502 |
| 13 | 0,78197 |
| 14 | 0,75179 |
| 15 | 0,4995  |

Subset

"HIGH *mTOR*"

(set 1)

|    |         |
|----|---------|
| 16 | 8,12868 |
| 17 | 2,8871  |
| 18 | 16,4435 |
| 19 | 7,55925 |
| 20 | 8,13857 |
| 21 | 1,75096 |
| 22 | 6,39349 |
| 23 | 15,5318 |
| 24 | 20,4619 |

|    |         |
|----|---------|
| 25 | 19,5467 |
| 26 | 18,3461 |
| 27 | 2,34972 |
| 28 | 4,14626 |
| 29 | 1,93892 |
| 30 | 6,92782 |
| 31 | 2,40745 |
| 32 | 3,98337 |
| 33 | 2,68639 |
| 34 | 16,1098 |
| 35 | 1,83962 |
| 36 | 4,86948 |
| 37 | 1,78893 |
| 38 | 2,08107 |
| 39 | 2,94207 |
| 40 | 2,22511 |
| 41 | 2,28718 |
| 42 | 2,76822 |
| 43 | 9,54399 |
| 44 | 4,10254 |
| 45 | 6,13868 |
| 46 | 6,95261 |

|                    |    |         |
|--------------------|----|---------|
|                    | 47 | 10,637  |
| END-STAGE patients |    |         |
| (set 1)            |    |         |
|                    | 48 | 30,3572 |
|                    | 49 | 27,4445 |
|                    | 50 | 11,4356 |
|                    | 51 | 8,01631 |
|                    | 52 | 1,73255 |
|                    | 53 | 1,85561 |
|                    | 54 | 7,7295  |
|                    | 55 | 1,95108 |
|                    | 56 | 4,17326 |
|                    | 57 | 8,48514 |
|                    | 58 | 6,98344 |
|                    | 59 | 11,8258 |
|                    | 60 | 5,13704 |
|                    | 61 | 19,9551 |
| Subset             |    |         |
| "LOW <i>mTOR</i> " |    |         |
| (set 2)            |    |         |
|                    | 1  | 0,54626 |

|   |         |
|---|---------|
| 2 | 0,82674 |
| 3 | 0,82808 |
| 4 | 0,71773 |
| 5 | 0,6904  |
| 6 | 0,37478 |
| 7 | 0,70077 |
| 8 | 0,7754  |

Subset

"HIGH *mTOR*"

(set 2)

|    |         |
|----|---------|
| 9  | 6,29006 |
| 10 | 1,95969 |
| 11 | 15,8527 |
| 12 | 6,92144 |
| 13 | 4,9694  |
| 14 | 7,84087 |
| 15 | 4,32442 |
| 16 | 1,78696 |
| 17 | 1,54719 |
| 18 | 7,00695 |

END-STAGE patients

(set 2)

|    |         |
|----|---------|
| 19 | 3,59205 |
| 20 | 4,43402 |
| 21 | 33,8368 |
| 22 | 1,91851 |
| 23 | 6,70406 |
| 24 | 1,962   |
| 25 | 17,569  |
| 26 | 3,73163 |
| 27 | 1,95205 |
| 28 | 1,58341 |
| 29 | 13,0912 |
| 30 | 6,04466 |
| 31 | 1,40992 |

## Supplementary, Results

### Clinical parameters of 18 OA outpatients (set 2)

Analysis of demographic and clinical characteristics of 18 OA outpatients (set 2) revealed that K&L OA grades of the examined subjects varied from 2 to 3 (grade II, 13 patients; grade III, 5 patients). The average disease duration was 14.0 years (range 2-29 years). The majority of patients exhibited Heberden's nodes and an increased BMI (range 27.2-39.1). All the patients had normal bone mineral density (BMD). The WOMAC score indicated moderate rates of knee pain in these OA outpatients. Synovitis at the knee joint was detected in 53% of the OA outpatients.

### Whole blood gene expression

Examination of gene expression in the whole blood of 18 OA outpatients (set 2) revealed that *mTOR* was significantly downregulated in 8 patients compared to healthy controls, while 10 subjects exhibited *mTOR* gene upregulation (**Supplementary, Fig. 6A**). Therefore, all the examined OA outpatients were divided into 2 subsets: a "Low *mTOR*" expression subset (8 patients) and a "High *mTOR*" expression subset (10 patients). The data regarding relative *mTOR* gene expression is presented in **Supplementary, Table 3**.

Examination of the expression of *ULK1*, *p21*, *caspase 3*, and *TNF $\alpha$*  in the peripheral blood of set 2 OA outpatients demonstrated that the "Low *mTOR*" expression subset of OA outpatients exhibited significant upregulation of *TNF $\alpha$*  gene, while *ULK1*, *caspase 3*, and *p21* expression remained similar to that in healthy individuals (**Supplementary, Fig. 6B-E**). In contrast, the "High *mTOR*" expression subset of OA outpatients exhibited significant upregulation all of the examined genes in comparison to healthy controls (**Supplementary, Fig. 6**). Gene expression studies in the 13 end-stage OA patients undergoing joint



replacement surgery (set 2) demonstrated that all of the examined genes were also overexpressed in their blood in comparison to healthy controls (**Supplementary, Fig. 6**).

### **Protein levels of phospho-p70-S6K in isolated PBMCs**

We analyzed the protein levels of phospho-p70-S6K serine/threonine kinase in the PBMC fraction of whole blood from 18 OA outpatients (set 2) and 13 end-stage OA subjects (set 2). These studies showed that the “Low *mTOR*” expression subset OA outpatients possessed significantly lower phospho- p70-S6K protein concentrations in PBMCs compared to the “High *mTOR*” expression subset OA outpatients and to the end-stage OA subjects (**Supplementary, Fig. 6F**). When the amount of the examined proteins was evaluated and compared to amounts in healthy subjects, we observed that the “Low *mTOR*” subset OA outpatients possessed significantly lower phospho- p70-S6K protein. In contrast, protein concentrations of phospho-p70-S6K in the “High *mTOR*” subset OA outpatients and in the end-stage OA subjects significantly exceeded the concentrations in healthy individuals (**Supplementary, Fig. 6F**).

### **Examination of gene expression in the articular cartilage of the end-stage OA patients**

Articular cartilage degradation in the end-stage OA patients at arthroplasty was associated with significantly higher levels of matrix metalloproteinases *MMP-13*, and *MMP-9*, as well as type X collagen (*COL10A1*) gene expression in the cartilage of another sample (set 2) of the end-stage OA patients compared to another sample of healthy subjects (set 2) (**Supplementary, Fig. 7**). This was accompanied by significant upregulation of *mTOR* expression and downregulation of *ULK1* in comparison to healthy controls (**Supplementary, Fig. 7**). At the same time, no significant changes in *caspase 3* and *p21* gene expression in these OA patients versus healthy subjects were observed.

## Supplementary, FIGURE LEGENDS

**Figure 5.** A relationship between *mTOR* gene expression measured in the blood or articular cartilage from end-stage OA patients (n=11, set 2) without outliers (n=2, set 2).

**Figure 6.** Relative expression of the genes *mTOR* (A), *ULK1* (B), *p21* (C), *caspase 3* (D), and *TNF $\alpha$*  (E) with reference to  *$\beta$ -actin* determined by real-time PCR analyses of whole blood from “Low *mTOR*” subset (n=8), “High *mTOR*” subset (n=10) and end-stage OA patients (n=13) (set 2) compared with healthy controls (n=27); (F), protein concentrations of phospho-p70-S6K measured by ELISA in PBMCs from the “Low *mTOR*” subset (n=8), the “High *mTOR*” subset (n=10), and end-stage (n=13) OA patients (set 2), compared to control subjects (n=27). Asterisks indicate significant differences from the control in pairwise comparisons (Student’s unpaired t-test).

**Figure 7.** Relative expression of the genes *mTOR*, *COL10A1*, *MMP-13*, *MMP-9* (A), and *ULK1*, *p21*, and *caspase 3* (B) with reference to  *$\beta$ -actin* as determined by real-time PCR analyses in osteoarthritic cartilage (n=13) (set 2) compared with healthy cartilage (n=12) (set 2). Controls are shown as 1.0 as required for relative quantification with the real-time PCR protocol. Asterisks indicate significant differences from the control (Student’s unpaired t-test). Note: #, only one subject from a new set of cartilage samples from healthy individuals demonstrated MMP13 gene expression.

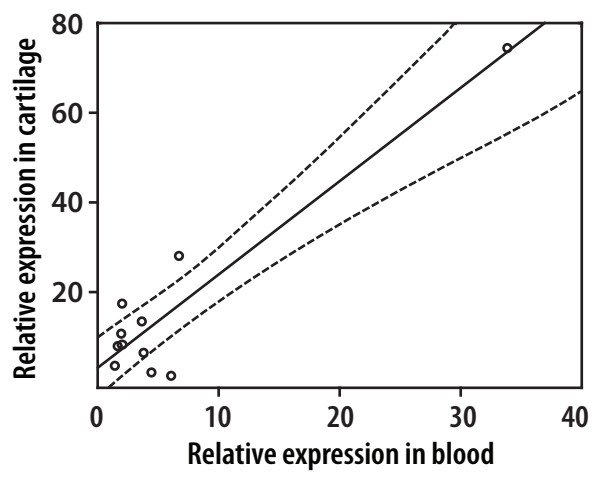

Figure 5

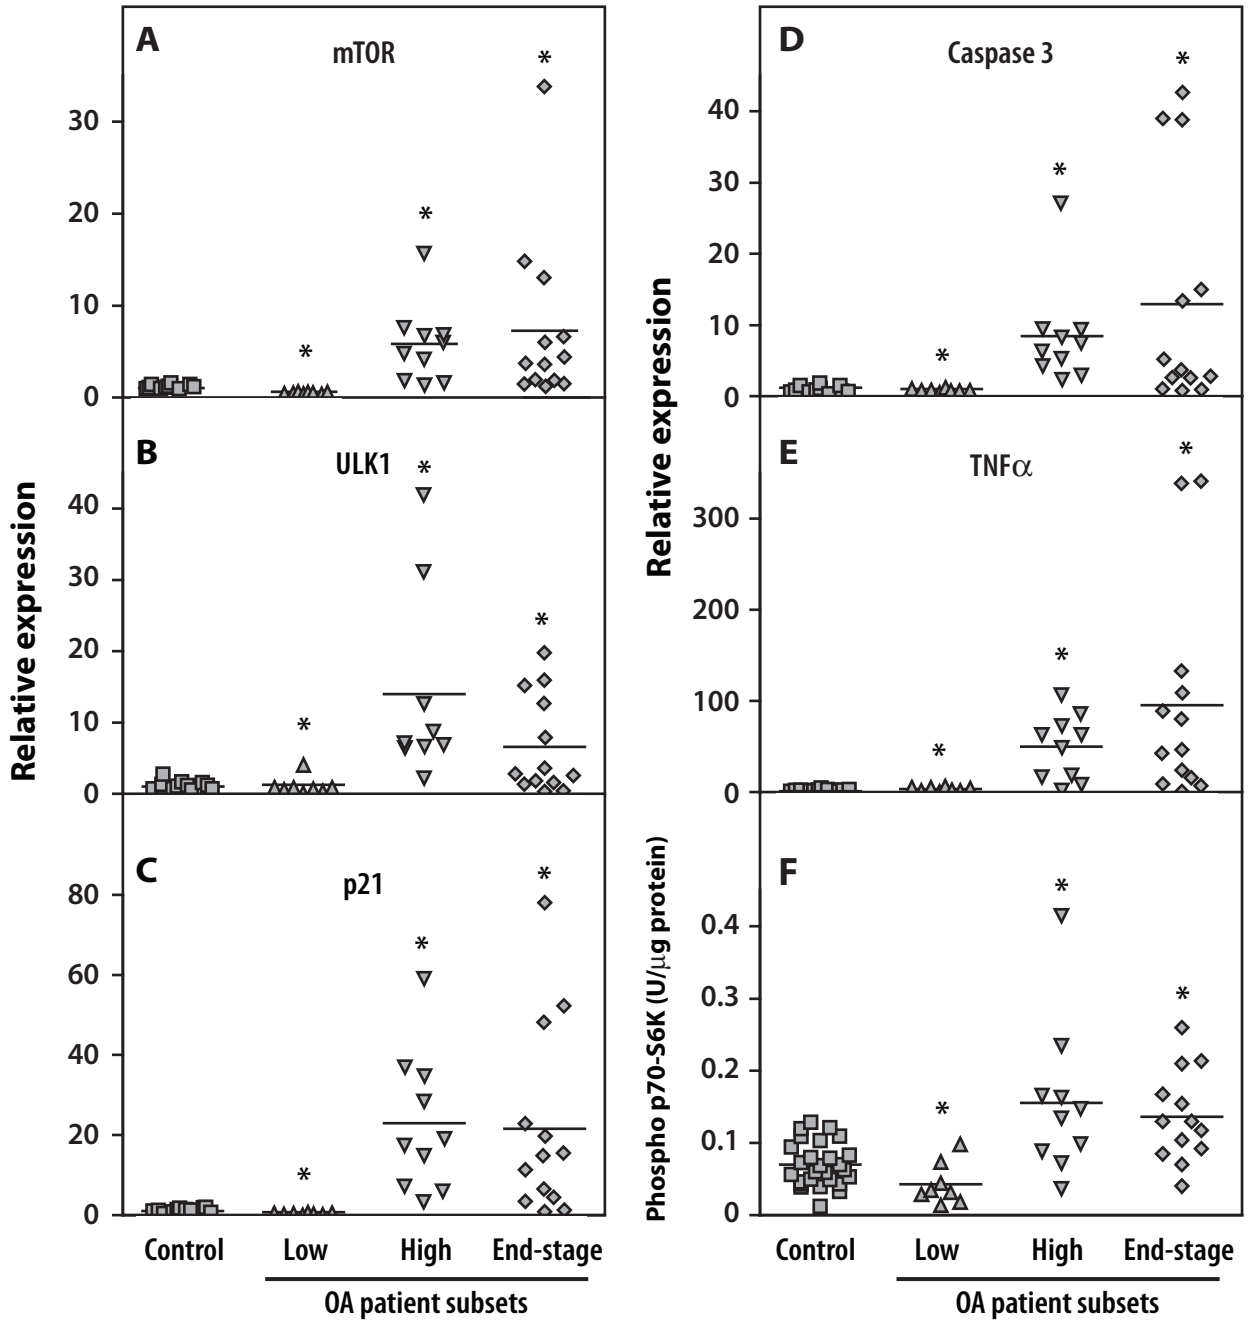

Figure 6

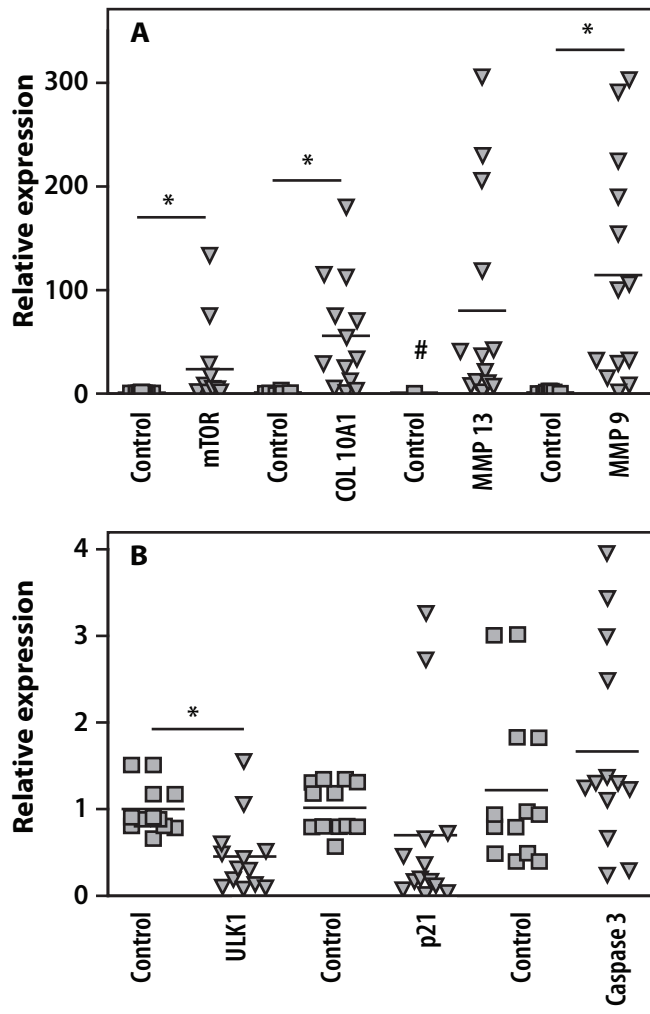

Figure 7
